# Supplementary material
Source: PubMed Central journal article supplement (PMC8130586)

| Study                 | Decannulated | Total | Weight | Proportion [95% CI]  |
|-----------------------|--------------|-------|--------|----------------------|
| Sun et al             | 5            | 12    | 3.1%   | 0.417 [0.152; 0.723] |
| Murphy et al          | 1            | 11    | 3.0%   | 0.091 [0.002; 0.413] |
| Aodeng et al          | 0            | 14    | 3.2%   | 0.000 [0.000; 0.232] |
| Sancho et al          | 9            | 11    | 3.0%   | 0.818 [0.482; 0.977] |
| Stubington et al      | 7            | 12    | 3.1%   | 0.583 [0.277; 0.848] |
| Ahmed et al           | 18           | 64    | 3.8%   | 0.281 [0.176; 0.408] |
| Angel et al           | 8            | 104   | 3.9%   | 0.077 [0.034; 0.146] |
| Avilés–Jurado et al   | 42           | 50    | 3.7%   | 0.840 [0.709; 0.928] |
| Botti et al           | 29           | 47    | 3.7%   | 0.617 [0.464; 0.755] |
| Chao et al            | 7            | 53    | 3.8%   | 0.132 [0.055; 0.253] |
| Courtney et al        | 12           | 20    | 3.4%   | 0.600 [0.361; 0.809] |
| Floyd et al           | 7            | 38    | 3.7%   | 0.184 [0.077; 0.343] |
| Kumar Swain et al     | 8            | 22    | 3.4%   | 0.364 [0.172; 0.593] |
| Kwak et al            | 94           | 148   | 3.9%   | 0.635 [0.552; 0.713] |
| Long et al            | 25           | 67    | 3.8%   | 0.373 [0.258; 0.500] |
| Martinez–Tellez et al | 11           | 27    | 3.5%   | 0.407 [0.224; 0.612] |
| Martin–Villares et al | 683          | 1890  | 4.0%   | 0.361 [0.340; 0.384] |
| Picetti et al         | 51           | 66    | 3.8%   | 0.773 [0.653; 0.867] |
| QEHB COVID–19 AT      | 84           | 100   | 3.9%   | 0.840 [0.753; 0.906] |
| Rosano et al          | 47           | 121   | 3.9%   | 0.388 [0.301; 0.481] |
| Rovira et al          | 167          | 201   | 3.9%   | 0.831 [0.772; 0.880] |
| Singh et al           | 40           | 52    | 3.7%   | 0.769 [0.632; 0.875] |
| Turri–Zanoni et al    | 1            | 32    | 3.6%   | 0.031 [0.001; 0.162] |
| Volo et al            | 6            | 23    | 3.5%   | 0.261 [0.102; 0.484] |
| Weiss et al           | 19           | 28    | 3.5%   | 0.679 [0.476; 0.841] |
| Broderick et al       | 6            | 10    | 3.0%   | 0.600 [0.262; 0.878] |
| Valchanov et al       | 6            | 38    | 3.7%   | 0.158 [0.060; 0.313] |
| Piccin et al          | 14           | 24    | 3.5%   | 0.583 [0.366; 0.779] |

**Total (95% CI)** 3285 100.0% 0.442 [0.340; 0.547]

**Prediction interval** [0.020; 0.926]

Heterogeneity:  $\tau^2 = 0.0665$ ;  $\chi^2 = 605.93$ ,  $df = 27$  ( $P < 0.01$ );  $I^2 = 96\%$

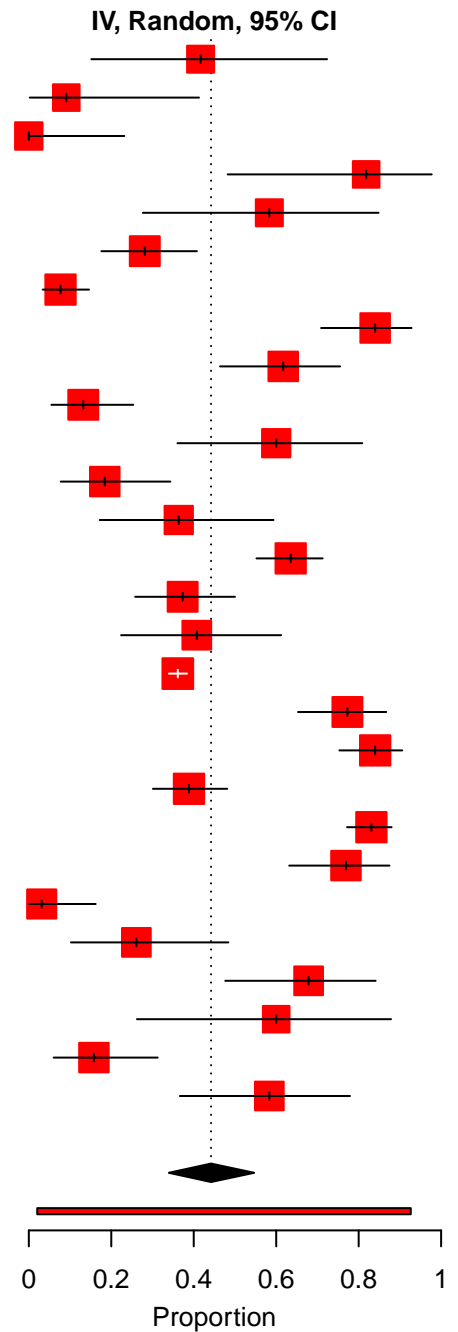

Supplement: mmc2.pdf [file mmc2.pdf]
