# Supplementary material
Source: PubMed Central journal article supplement (PMC8130586)

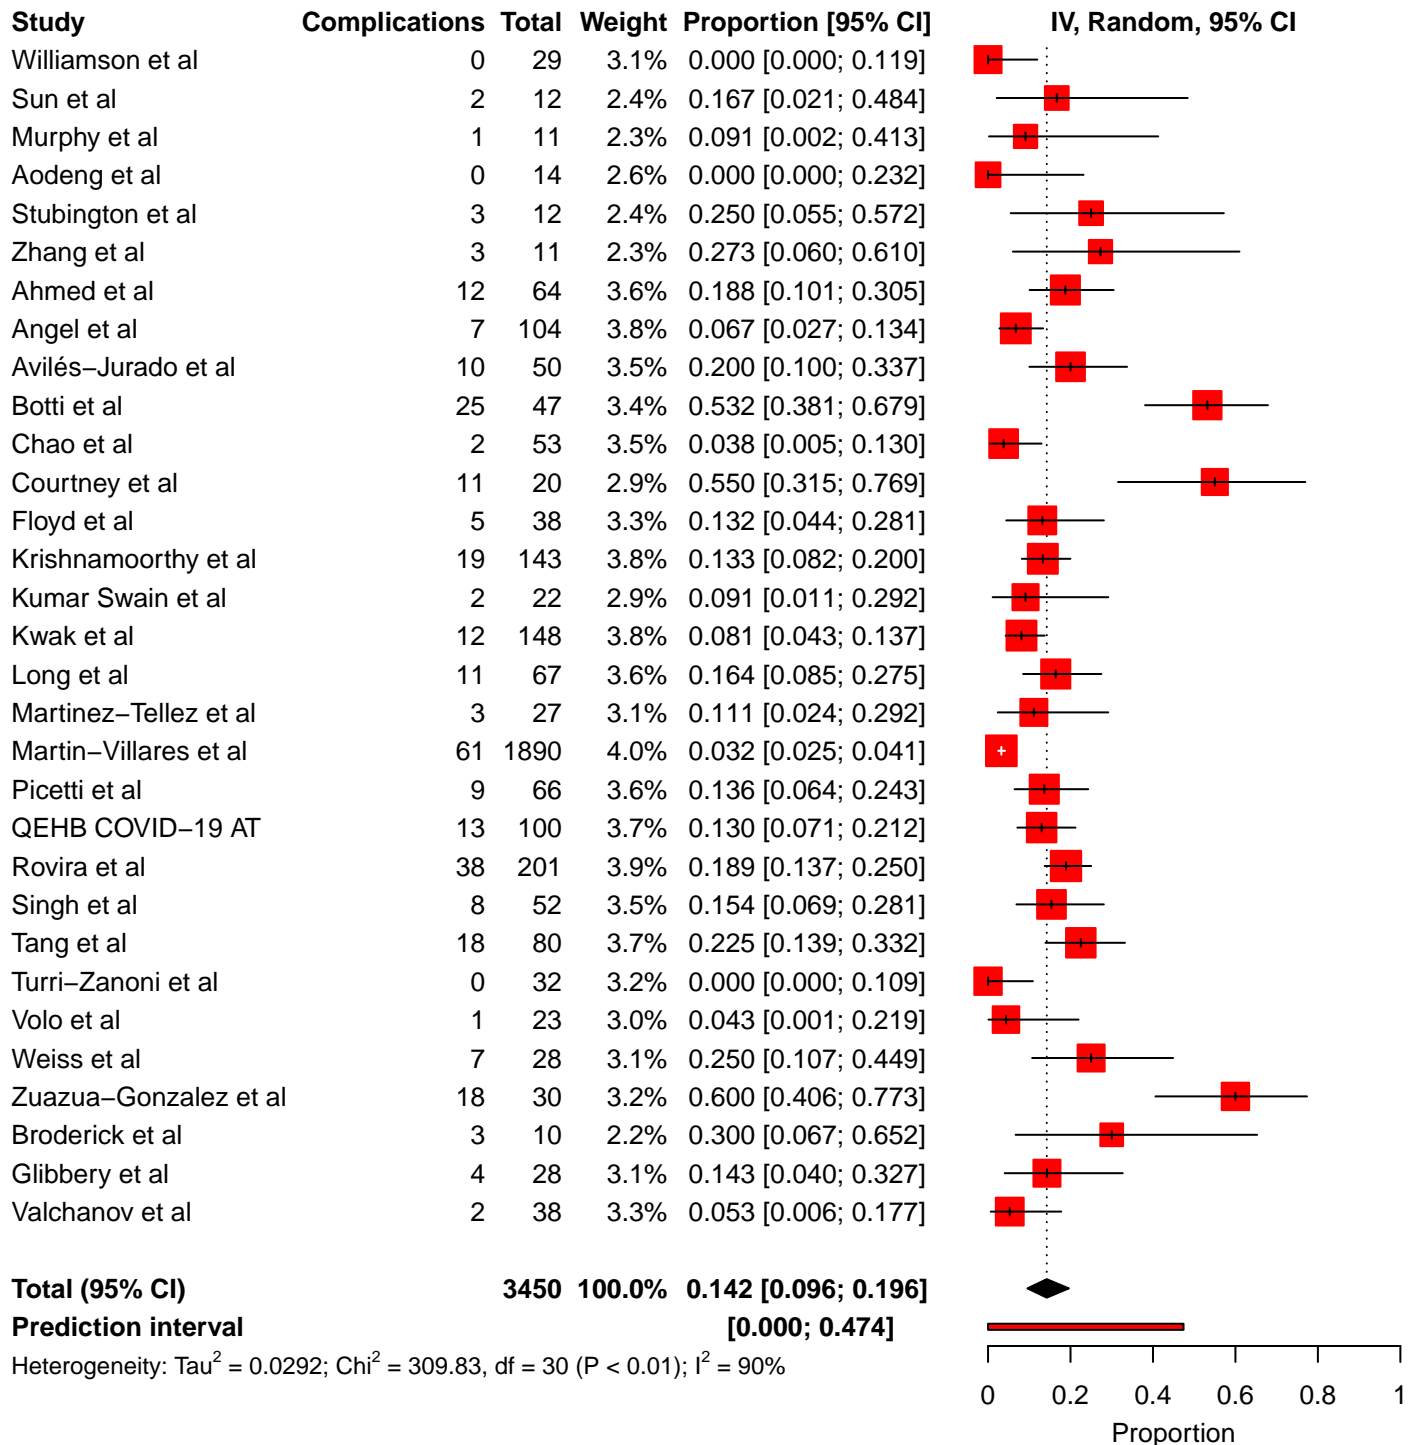

Supplement: mmc3.pdf [file mmc3.pdf]

*Kendall's tau 0.253; p = 0.027*

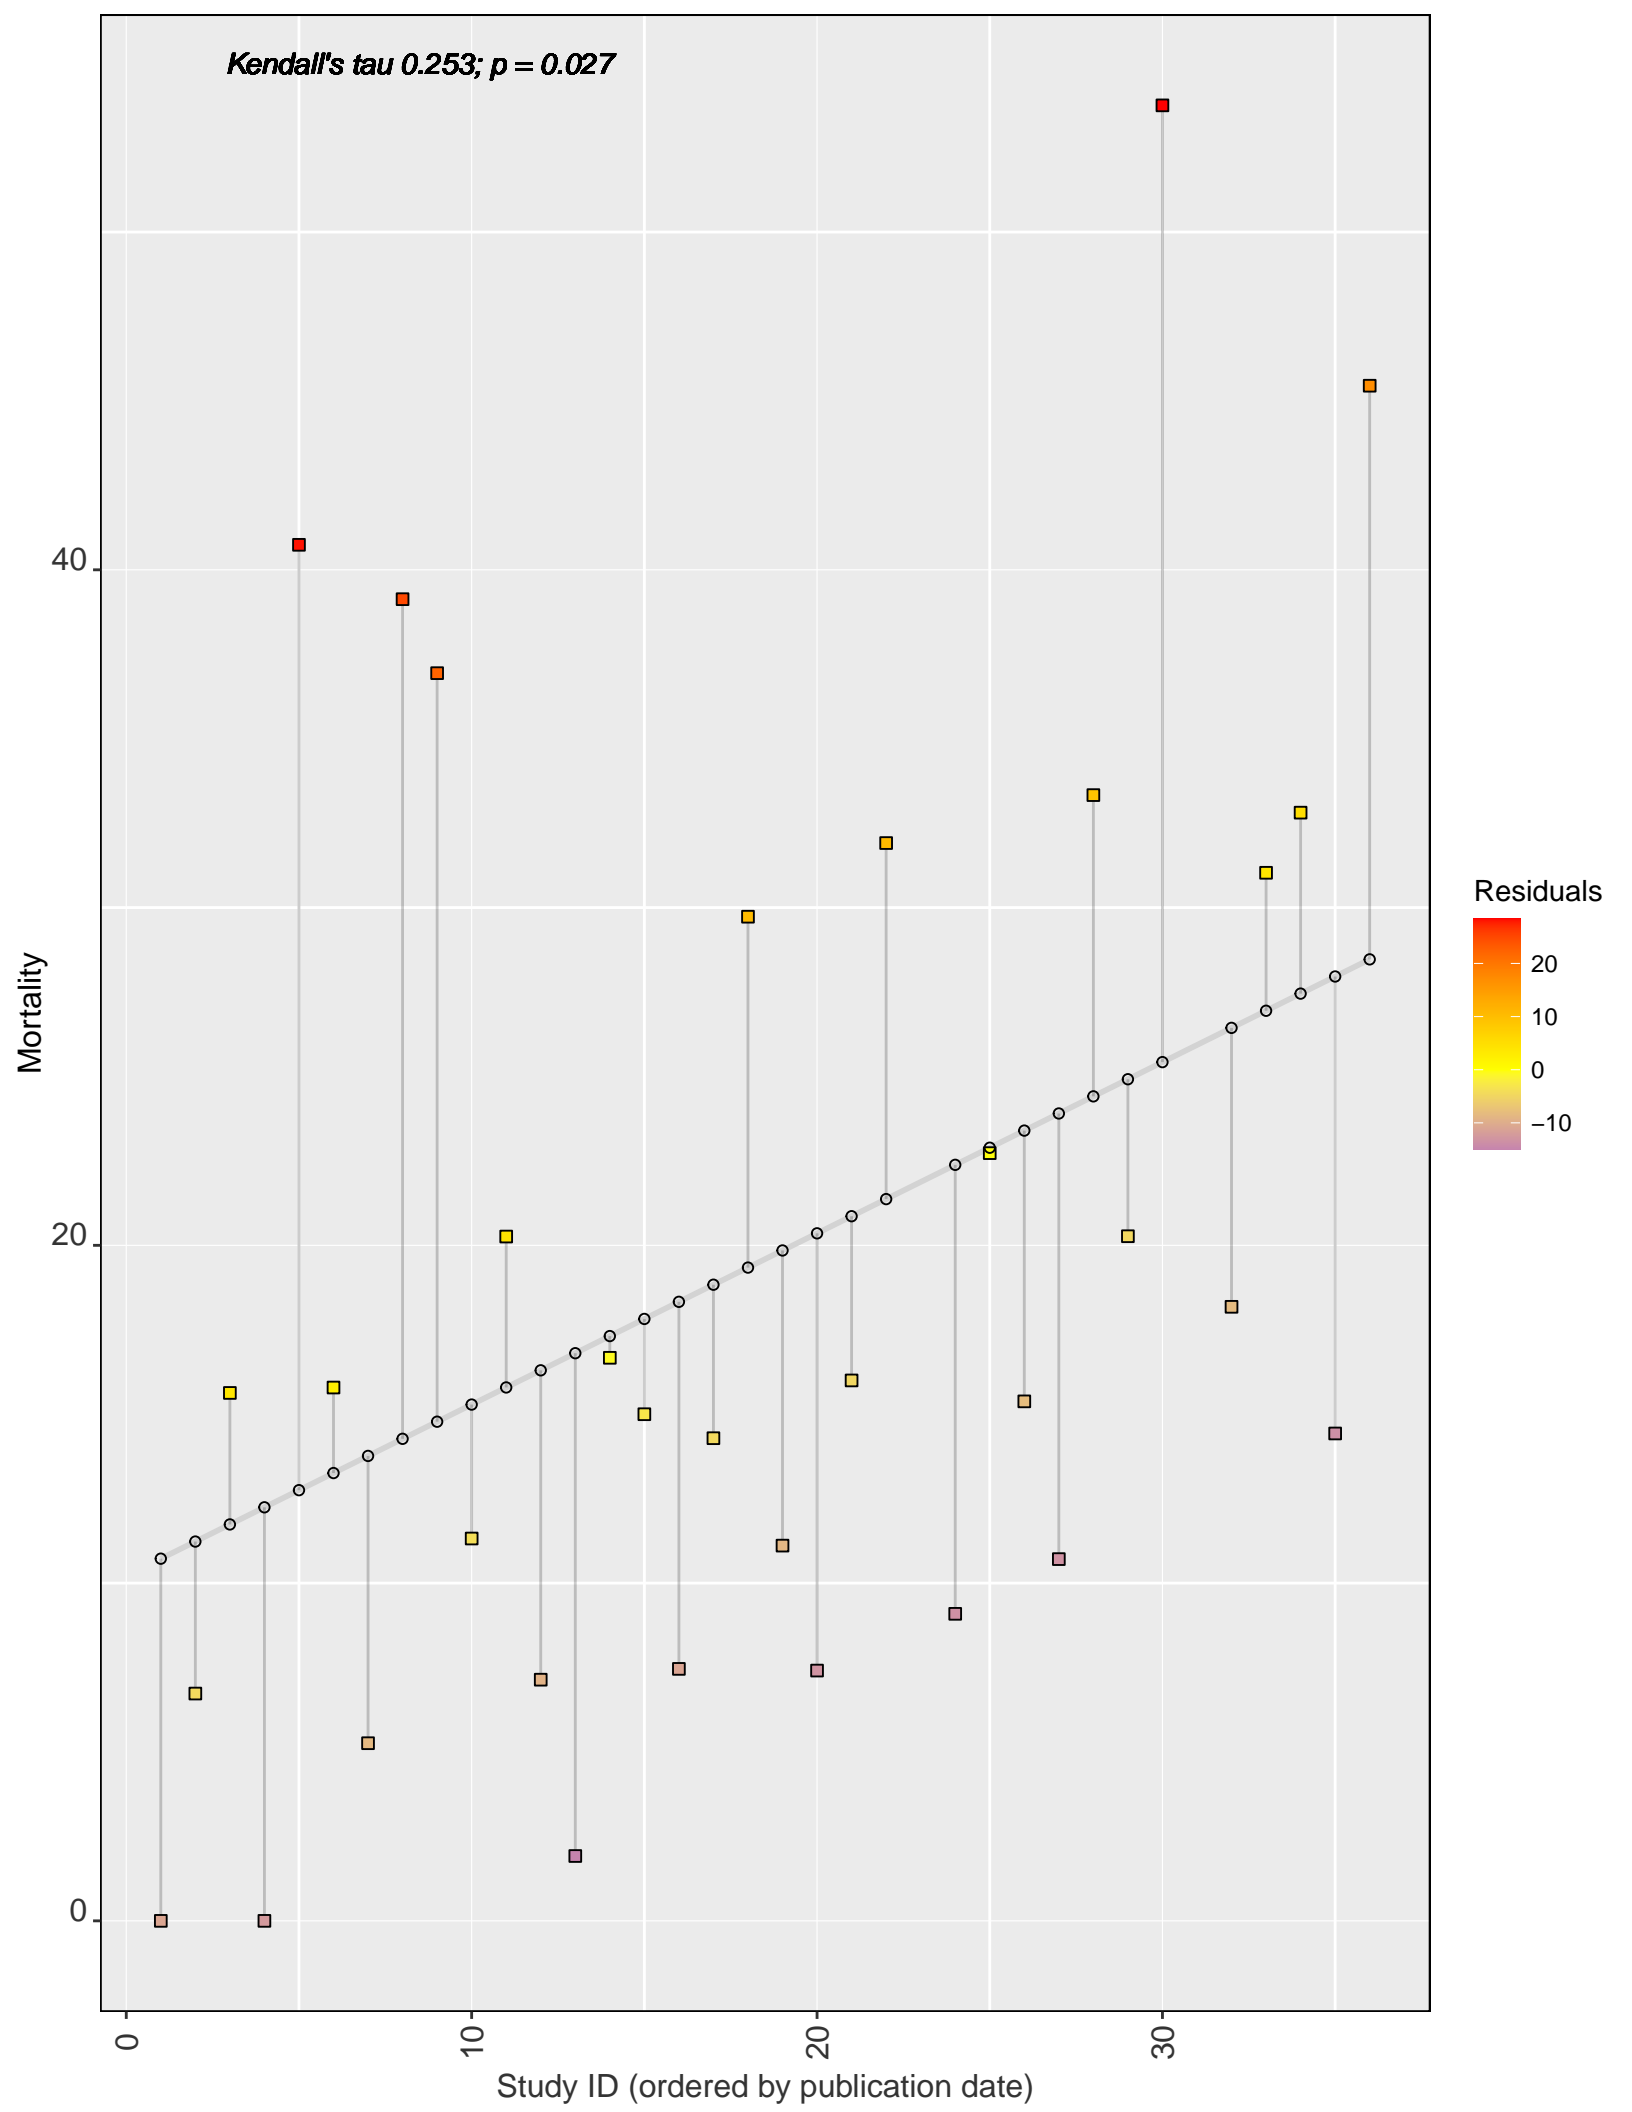

Supplement: mmc4.pdf [file mmc4.pdf]
